# Supplementary material for: Room-temperature synthesis of water-dispersible sulfur-doped reduced graphene oxide without stabilizers
Source: Royal Society of Chemistry journal article supplement (doi:10.1039/d0ra04838k), 2020-01-01
Supplement: d0ra04838k1.pdf [file d0ra04838k1.pdf]

## Electronic Supplementary Information

### Room-Temperature Synthesis of Water-Dispersible Sulfur-Doped Reduced Graphene Oxide without Stabilizers

Jianqiang Guo,<sup>\*abc</sup> Weimiao Wang,<sup>d</sup> Yue Li,<sup>ab</sup> Jiafeng Liang,<sup>ab</sup> Qiaosi Zhu,<sup>ab</sup> Jiongli Li<sup>\*abc</sup> and Xudong Wang<sup>abc</sup>

<sup>a</sup> AECC Beijing Institute of Aeronautical Materials, Beijing 100095, China

<sup>b</sup> Beijing Institute of Graphene Technology, Beijing 100094, China

<sup>c</sup> Beijing Engineering Research Centre of Graphene Application, Beijing 100095, China

<sup>d</sup> School of Materials and National Graphene Institute, the University of Manchester, Manchester M13 9PL, UK;

\* Correspondence: guojianqiang2010@163.com;

#### 1. Elemental data of reduced graphene oxide by XPS spectra.

**Table S1.** Elemental data of reduced graphene oxide prepared using different amounts of NaSH • H<sub>2</sub>O

| R <sub>NaSH/GO</sub> | C (wt%) | S (wt%) | O (wt%) | C/S   | C/O  |
|----------------------|---------|---------|---------|-------|------|
| 0:1 (GO)             | 65.84   | 0       | 29.55   | --    | 2.23 |
| 0.5:1                | 72.18   | 1.96    | 22.20   | 36.83 | 3.25 |
| 1:1                  | 78.37   | 2.29    | 17.85   | 34.22 | 4.39 |
| 2:1                  | 84.03   | 2.46    | 12.71   | 34.16 | 6.71 |
| 5:1                  | 84.26   | 2.53    | 12.45   | 33.30 | 6.77 |
| 10:1                 | 85.06   | 2.39    | 11.97   | 35.59 | 7.11 |
| 20:1                 | 83.94   | 2.62    | 12.69   | 32.04 | 6.61 |
| 40:1                 | 84.55   | 2.45    | 12.34   | 34.51 | 6.85 |

## 2. Comparison of S-rGO prepared by different methods

**Table S2.** Comparison of S-rGO prepared by different methods

| No | Method                      | Precursor                                                                | Reaction Conditions                                    | C/O ratio<br>(XPS data)               | Sulfur Element                         | Ref. |
|----|-----------------------------|--------------------------------------------------------------------------|--------------------------------------------------------|---------------------------------------|----------------------------------------|------|
| 1  | CVD method                  | Sulfur/hexane vapor                                                      | 950°C, 2.5min                                          | >99                                   | 0.60 at.%                              | [1]  |
| 2  | CVD method                  | Graphene/H <sub>2</sub> S                                                | 1000°C, 5min                                           | /                                     | 0.96 at.%                              | [2]  |
| 3  | Thermal Annealing           | GO/Benzyl disulfide<br>(BDS)                                             | 600°C, 30min<br>900°C, 30min<br>1050°C, 30min          | /<br>/<br>/                           | 1.53 wt%<br>1.35 wt%<br>1.30 wt%       | [3]  |
| 4  | Thermal Annealing           | GO/BDS                                                                   | 1050°C, 30min                                          | /                                     | 2.54 wt%                               | [4]  |
| 5  | Thermal Annealing           | GO/Phenyl disulfide                                                      | 1000°C, 30min                                          | 6.72-40.71                            | 0.35-3.95 at.%                         | [5]  |
| 6  | Thermal Annealing           | GO/PEDOT                                                                 | 800°C, 3h                                              | /                                     | 2.02 wt%                               | [6]  |
| 7  | Thermal Annealing           | Graphite oxide/<br>SO <sub>2</sub> /H <sub>2</sub> S/CS <sub>2</sub> gas | 600-1000°C, 12min                                      | 9.30-24.09                            | 0.10-11.99 wt%                         | [7]  |
| 8  | Thermal Annealing           | GO/H <sub>2</sub> S gas                                                  | 250°C, 10-30min<br>650°C, 10-30min<br>1000°C, 10-30min | 5.94-6.69<br>6.77-7.03<br>22.72-30.85 | No<br>0.83-1.89 at.%<br>2.02-2.19 at.% | [8]  |
| 9  | Hydrothermal<br>Treatment   | GO/Na <sub>2</sub> S                                                     | 200°C, 10h                                             | 9.17*                                 | 2.22 at.% *                            | [9]  |
| 10 | Ethanol-thermal<br>reaction | GO/BDS/Ethanol                                                           | 180°C, 10h                                             | 8.68                                  | 1.20 at.%                              | [10] |
| 11 | Refluxing                   | GO/P <sub>4</sub> S <sub>10</sub>                                        | 120°C, 12h                                             | /                                     | 2.20 at.%                              | [11] |
| 12 | This work                   | GO/NaSH                                                                  | RT, 10min-2h                                           | 6.71                                  | 2.50 wt%                               |      |

\*measured by EDX.

## 3. PH of GO and S-rGO dispersions

**Table S3.** The PH of GO and rGO dispersions

| NaSH·xH <sub>2</sub> O: GO | 0:1  | 0.5:1 | 1:1  | 2:1  | 5:1   | 10:1 | 20:1 | 40:1  |
|----------------------------|------|-------|------|------|-------|------|------|-------|
| by weight ratio            |      |       |      |      |       |      |      |       |
| PH                         | 5.46 | 5.94  | 7.20 | 8.67 | 10.04 | 9.68 | 9.75 | 11.79 |

#### 4. $^{13}\text{C}$ MAS NMR spectra of S-rGO

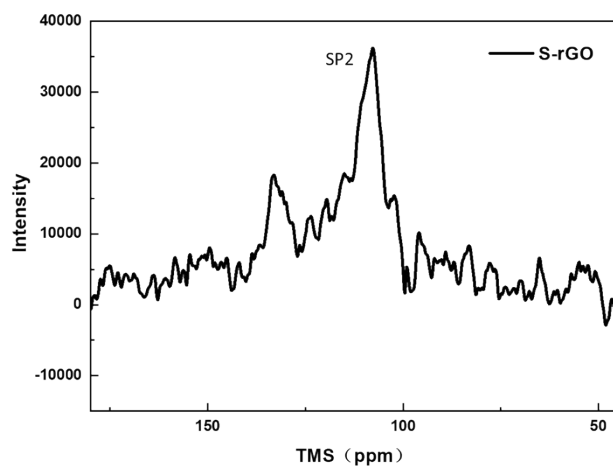

Fig.S1  $^{13}\text{C}$  NMR spectra of S-rGO in this work.

#### 5. XRD pattern of GO and S-rGO sheets.

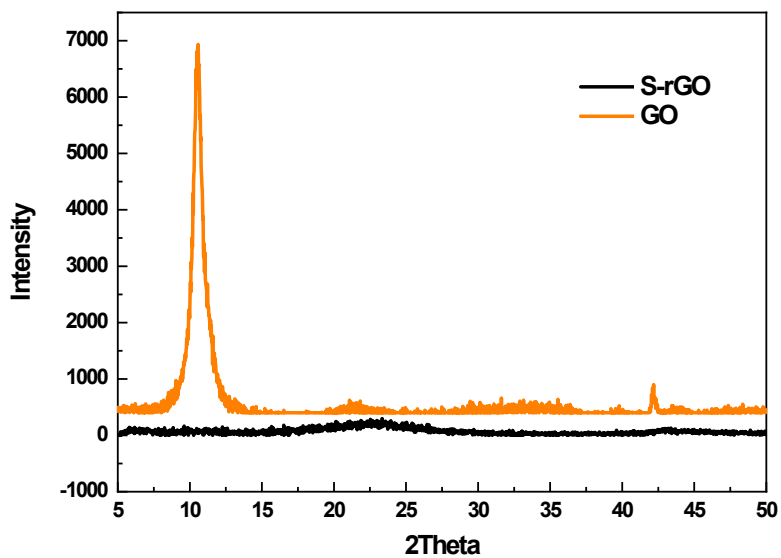

Fig. S2 XRD patterns of GO and rGO sheets

## 6. The fabrication of S-rGO laminate.

This simple method will facilitate the implementation of S-rGO into relevant applications. To proof the feasibility of this method, an S-rGO laminate was prepared base on this work.

Ref. 8 reported the S-rGO laminate for EMI shielding application, in which the S-rGO was prepared by thermal annealing process, and the laminate was fabricated by pressing the S-rGO powder. Based on our work, an S-rGO laminate with the sheet resistance of  $4096 \Omega/\text{m}^2$  can be obtained by directly filtering S-rGO dispersion at room temperature.

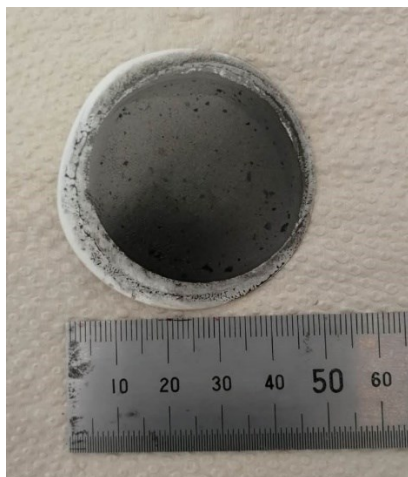

**Fig. S3** The digital photograph of the S-rGO laminate.

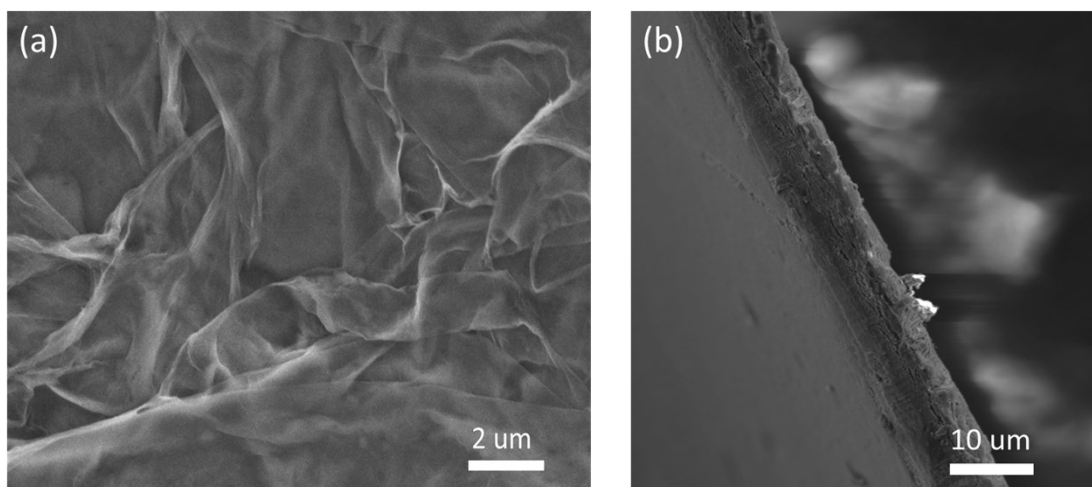

**Fig. S4** The SEM images of the S-rGO laminate, (a) surface, (b) cross-section.

## References

- [1] Gao H, Liu Z, Song L, Guo W, Gao W, Ci L, et al. Synthesis of S-doped graphene by liquid precursor. *Nanotechnology*. 2012;23:275605.
- [2] Liang C, Wang YL, Li T. Sulfur-doping in graphene and its high selectivity gas sensing in NO<sub>2</sub>. 2015 *Transducers - 2015 18th International Conference on Solid-State Sensors, Actuators and Microsystems (TRANSDUCERS)*; p. 1421-1424.
- [3] Yang Z, Yao Z, Li G, Fang G, Nie H, Liu Z, et al. Sulfur-Doped Graphene as an Efficient Metal-free Cathode Catalyst for Oxygen Reduction. *ACS Nano*. 2012;6(1):205-211.
- [4] Xia L, Yang J, Wang H, Zhao R, Chen H, Fang W, et al. Sulfur-doped graphene for efficient electrocatalytic N<sub>2</sub>-to-NH<sub>3</sub> fixation. *Chem Commun*. 2019;55(23):3371-3374.
- [5] Hoque MA, Hassan FM, Seo M-H, Choi J-Y, Pritzker M, Knights S, et al. Optimization of sulfur-doped graphene as an emerging platinum nanowires support for oxygen reduction reaction. *Nano Energy*. 2016;19:27-38.
- [6] Cai B, Shao C, Qu L, Meng Y, Jin L. Preparation of sulfur-doped graphene fibers and their application in flexible fibriform micro-supercapacitors. *Frontiers of Materials Science*. 2019;13(2):145-153.
- [7] Poh HL, Šimek P, Sofer Z, Pumera M. Sulfur-Doped Graphene via Thermal Exfoliation of Graphite Oxide in H<sub>2</sub>S, SO<sub>2</sub>, or CS<sub>2</sub> Gas. *ACS Nano*. 2013;7(6):5262-5272.
- [8] Shahzad F, Kumar P, Yu S, Lee S, Kim Y-H, Hong SM, et al. Sulfur-doped graphene laminates for EMI shielding applications. *Journal of Materials Chemistry C*. 2015;3(38):9802-9810.
- [9] Tian ZS, Li JT, Zhu GY, Lu JF, Wang YY, Shi ZL, et al. Facile synthesis of highly conductive sulfur-doped reduced graphene oxide sheets. *Phys Chem Chem Phys*. 2016;18(2):1125-1130.
- [10] Wang Z, Li P, Chen Y, He J, Zhang W, Schmidt OG, et al. Pure thiophene–sulfur doped reduced graphene oxide: synthesis, structure, and electrical properties. *Nanoscale*. 2014;6(13):7281-7287.
- [11] Klingele M, Pham C, Vuyyuru KR, Britton B, Holdcroft S, Fischer A, et al. Sulfur doped reduced graphene oxide as metal-free catalyst for the oxygen reduction reaction in anion and proton exchange fuel cells. *Electrochemistry Communications*. 2017;77:71-75.
